# Supplementary material for: The Complete Genome Sequence of Cupriavidus metallidurans Strain CH34, a Master Survivalist in Harsh and Anthropogenic Environments
Source: PLoS One. 2010 May 5;5(5):e10433. doi: 10.1371/journal.pone.0010433 (PMC2864759; doi:10.1371/journal.pone.0010433)
Supplement: Figure S8 — Genetic loci in C. metallidurans CH34 for the oxidation of hydrogen. (A) hox and hyp genes needed to form and activate the two hydrogenases of CH34. The first cluster of genes governs the membrane-bound hydrogenase (MBH) and is sited on CHR1 as part of the CMGI-2 genomic island. The second gene cluster encodes the cytoplasmic hydrogenase (SH) and is sited on CHR2 as part of the genomic island CMGI-3. (B) Multimeric composition of the MBH and SH metalloproteins and their cellular location in C. metallidurans CH34. While the MBH enzyme is transloacted to the periplasmic space and transfers electrons in one direction, the SH remains inside the cytoplasm and is able to transfer electrons in both directions, depending on NADH to NAD+ ratios in the cell. As such, the SH enzyme effectively acts as a ‘redox valve’. (0.06 MB XLS) [file pone.0010433.s008.xls]

## Sheet: hyp_hox clusters
Figure S8A: genetic loci in C. metallidurans CH34 involved in hydrogen oxidation (hydrogenotrophy)
First gene cluster on Chromosome 1
		Rmet_1280			Rmet_1281			Rmet_1282			Rmet_1283			Rmet_1284			Rmet_1285			Rmet_1286			Rmet_1287			Rmet_1288
		Rmet_1289			Rmet_1290			Rmet_1291			Rmet_1292			Rmet_1293				Rmet_1295				Rmet_1297			Rmet_1298							Rmet_1301
Second gene cluster on Chromosome 1
		Rmet_1506					Rmet_1522			Rmet_1523			Rmet_1524			Rmet_1525			Rmet_1526			Rmet_1527					Rmet_1529				Rmet_1533			Rmet_1534
		Rmet_1535			Rmet_1536			Rmet_1537			Rmet_1538			Rmet_1539			Rmet_1540			Rmet_1541			Rmet_1542					Rmet_1544

## Sheet: Hydrogenases
Figure 8SB: hydrogenase complexes of C. metallidurans CH34
																			HoxG		=	Rmet_1297
																			HoxK		=	Rmet_1298
																			HoxZ		=	Rmet_1295
																			HoxH		=	Rmet_1525
																			HoxU		=	Rmet_1523
																			HoxY		=	Rmet_1524
																			HoxF		=	Rmet_1522
																			HoxI		=	Rmet_1527
