# Supplementary material for: The Complete Genome Sequence of Cupriavidus metallidurans Strain CH34, a Master Survivalist in Harsh and Anthropogenic Environments
Source: PubMed Central journal article supplement (PMC2864759; doi:10.1371/journal.pone.0010433), 2010-05-05

**Fig. S4A:** synteny between *C. metallidurans* CH34 replicons and *P. necessarius* STIR1 (analysis performed by the LinePlot tool of MaGe)

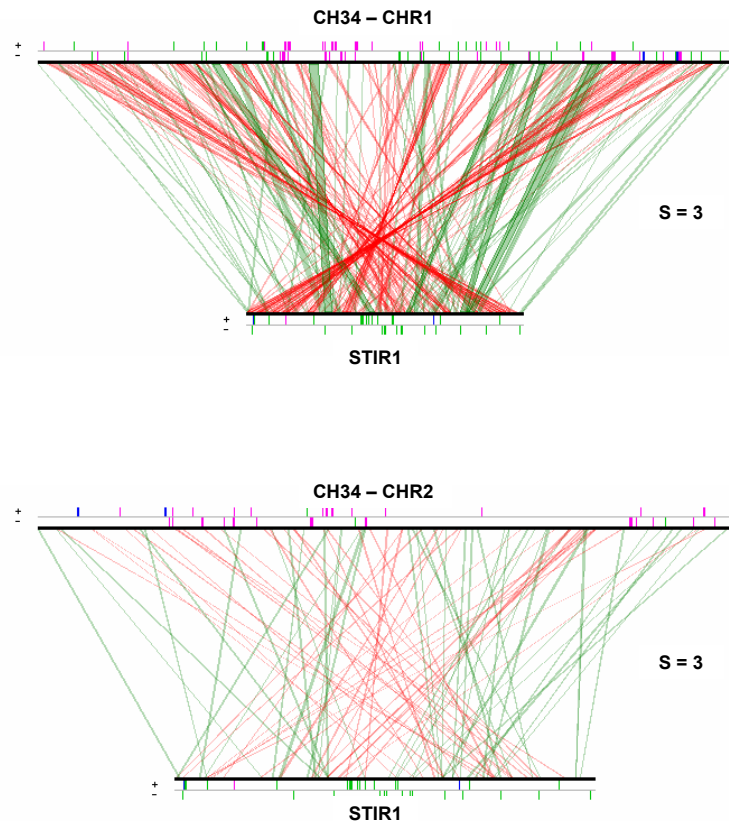

green and red lines depict strand conservations and strand inversions, respectively (S, synton size)

**genes indicated on both strands (+/-) of the DNA:**  
 pink = transposons (insertion sequences)  
 blue = rRNA  
 green = tRNA

**Fig. S4B:** PROmer analysis between CH34 (CHR1) and STIR1

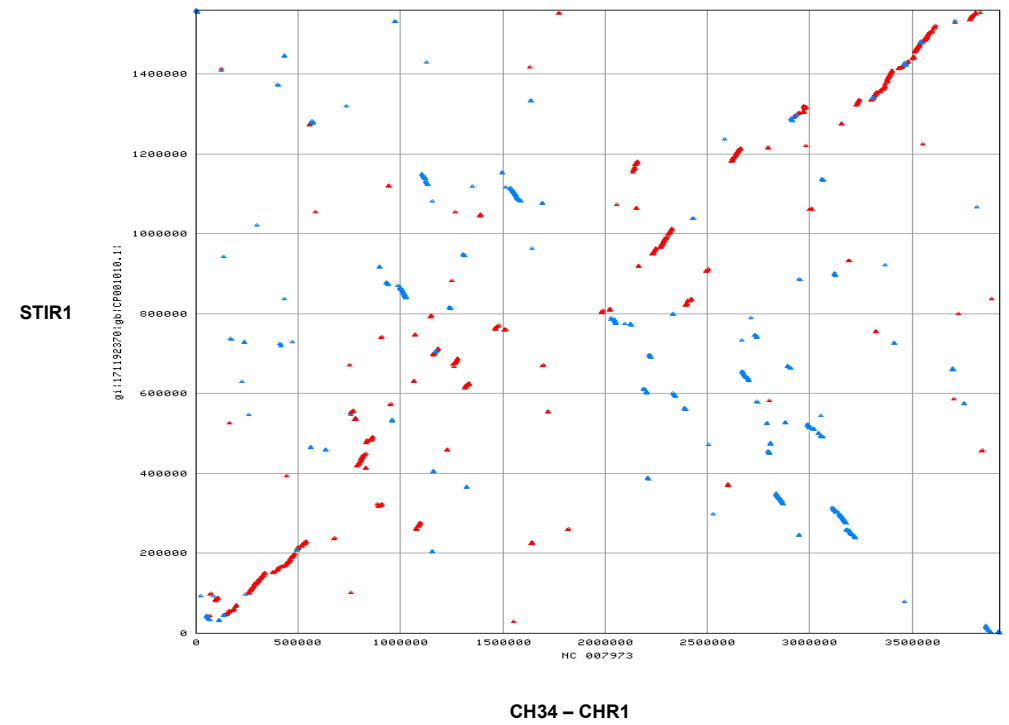

Supplement: pone.0010433.s004.pdf [file pone.0010433.s004.pdf]
