# Supplementary material for: The Complete Genome Sequence of Cupriavidus metallidurans Strain CH34, a Master Survivalist in Harsh and Anthropogenic Environments
Source: PLOS journal article supplement (doi:10.1371/journal.pone.0010433), 2010-05-05
Supplement: S9 (10.1371/journal.pone.0010433.s009) [file journal.pone.0010433.s009]

| Class             | Description                                                   | CHR1        | CHR1  | CHR2        | CHR2  | ratio | CHR1        | CHR2        |
|-------------------|---------------------------------------------------------------|-------------|-------|-------------|-------|-------|-------------|-------------|
| D                 | Cell cycle control, cell division, chromosome partitioning    | 50          | 1,33  | 10          | 0,41  | 3,28  | 35          | 4           |
| M                 | Cell wall/membrane/envelope biogenesis                        | 199         | 5,28  | 133         | 5,39  | 1,02  | 160         | 114         |
| N                 | Cell motility                                                 | 76          | 2,02  | 93          | 3,77  | 1,87  | 55          | 81          |
| O                 | Posttranslational modification, protein turnover, chaperones  | 197         | 5,23  | 45          | 1,82  | 2,87  | 144         | 27          |
| T                 | Signal transduction mechanisms                                | 191         | 5,07  | 167         | 6,76  | 1,33  | 125         | 111         |
| U                 | Intracellular trafficking, secretion, and vesicular transport | 119         | 3,16  | 78          | 3,16  | 1,00  | 49          | 21          |
| V                 | Defense mechanisms                                            | 101         | 2,68  | 54          | 2,19  | 1,23  | 48          | 29          |
| A                 | RNA processing and modification                               | 1           | 0,03  | 0           | 0,00  | 1     | 1           | 0           |
| B                 | Chromatin structure and dynamics                              | 4           | 0,11  | 0           | 0,00  | 1     | 3           | 0           |
| J                 | Translation, ribosomal structure and biogenesis               | 199         | 5,28  | 24          | 0,97  | 5,44  | 176         | 22          |
| K                 | Transcription                                                 | 296         | 7,86  | 273         | 11,06 | 1,41  | 228         | 228         |
| L                 | Replication, recombination and repair                         | 221         | 5,87  | 87          | 3,52  | 1,67  | 187         | 78          |
| C                 | Energy production and conversion                              | 295         | 7,83  | 184         | 7,45  | 1,05  | 247         | 156         |
| E                 | Amino acid transport and metabolism                           | 515         | 13,67 | 278         | 11,26 | 1,21  | 409         | 226         |
| F                 | Nucleotide transport and metabolism                           | 86          | 2,28  | 31          | 1,26  | 1,82  | 64          | 16          |
| G                 | Carbohydrate transport and metabolism                         | 210         | 5,58  | 140         | 5,67  | 1,02  | 93          | 33          |
| H                 | Coenzyme transport and metabolism                             | 137         | 3,64  | 41          | 1,66  | 2,19  | 96          | 24          |
| I                 | Lipid transport and metabolism                                | 194         | 5,15  | 185         | 7,49  | 1,45  | 155         | 164         |
| P                 | Inorganic ion transport and metabolism                        | 330         | 8,76  | 192         | 7,78  | 1,13  | 147         | 84          |
| Q                 | Secondary metabolites biosynthesis, transport and catabolism  | 132         | 3,51  | 144         | 5,83  | 1,66  | 71          | 75          |
| R                 | General function prediction only                              | 530         | 14,07 | 350         | 14,18 | 1,01  | 276         | 161         |
| S                 | Function unknown                                              | 284         | 7,54  | 242         | 9,80  | 1,30  | 271         | 232         |
|                   |                                                               | (1)         | (2)   | (3)         | (4)   | (5)   | (6)         | (7)         |
| <b>nr. of CDS</b> |                                                               | <b>3766</b> |       | <b>2469</b> |       |       | <b>3040</b> | <b>1886</b> |

**Table S1** - distribution of functional content over the two large replicons of *C. metallidurans* CH34

The CDS numbers in columns (1) and (3) were extracted from COG tables obtained via the MaGe Export page and are in principle equal to the numbers obtained from the MaGe Genome Overview page (COG Automatic Classification). Classification into COGs is done by the COGnitor software imbedded into the MaGe system in which each protein is compared to the COG databank using BlastP. All best hits are scanned and the protein is classified in a COG if this protein has at least 3 Best Hits with proteins classified in the same COG but originating from 3 different taxonomic clades. As a consequence, proteins may be classified in more than one COG. Columns (2) and (4) are the percentages per replicon while column (5) is the ratio of these percentages. These ratios are used to draw Fig. 2 to display the bias towards particular COG classes. Columns (6) and (7) represent COG numbers taking only the highest COGnitor score into account (e.g. for colorcoding in Fig.1).
