# Supplementary material for: The Complete Genome Sequence of Cupriavidus metallidurans Strain CH34, a Master Survivalist in Harsh and Anthropogenic Environments
Source: PLoS One. 2010 May 5;5(5):e10433. doi: 10.1371/journal.pone.0010433 (PMC2864759; doi:10.1371/journal.pone.0010433)
Supplement: Table S2 — Novel HMR genes in Cupriavidus metallidurans CH34. Correspondance between HMR loci reported here with HMR loci reported in an earlier overview [8]. Novel genes are given in bold letter type. (0.02 MB XLS) [file pone.0010433.s010.xls]

## Sheet: Sheet1
Replicon	Final gene cluster annotation	Former annotation (FEMS Review)	old contig
CHR1	cdfX pbrR2 cadA pbrC, pbrR3	pbrR2 pbrA-like pbrC, pbrR3	691, 710
pMOL30	pbrUb | pbrUaTR pbrABCD (#)	pbrTRABCD	692
CHR1	merRTPA'A''	merRTPA'A''	691
pMOL28	merRTPADE urf-2	merRTPADE urf-2	712
pMOL30	merRTPADE urf-2	merRTPADE urf-2	692
pMOL30	merRTDP	merRTDP	663
CHR2	chrBAF	chrBAF	652
pMOL28	chrIBACEFONPYZ	chrIBACEF	712
CHR2	cusDCBAF	cusCBA cusX	619
pMOL30	silDCBA cusDF	czcC silBA	709
CHR2	copSRABCD	copSRABCD	711
pMOL30	copVTKMNSRABCDIJGFOLQHEW	copTKSRABCDIGFLH	709
CHR2	zntA czcICDBA ubiG czcSRL | hns mmmQ (†)	cadA czcIC DczcB	649
		czcBA phnB czrSR	280-465
pMOL30	czcMNICBADRSEJ ompP czcP	czcNICBADRSE cadA-like	663
CHR2	nimBA | AC (*)	czcB czcA DIS czcA nccC cadC	711
pMOL28	cnrYXHCBAT	cnrYXHCBAT	712
pMOL30	nccCB''B'A nreB mmrQ	cnrCBA nreB	709
CHR1	arsPHC1BC2IRM	arsHC arsC/B arsC Orf DarsR arsR	596
CHR1	cupRAC	merR cupA orfG	710
CHR1	agrCBARS	agrCBARS	609
CHR1	hmzRS yodB hmzBDA	czcRS Orf7266 cybB czcBA	696
CHR2	hmvCBDA	czcCBA	593
CHR2	zniABCSR znePRSCAB	czcABCSR	647
		czcRSCADB	647
CHR2	hmyCB | hmyA (‡)	czcA	695
	Underlined genes are regulators; bold genes are new in respect to an earlier report [8]. Geneparts created by
	frameshift are indicated by ‘ and “; IS- or Tn-insertions are indicated by a pipe symbol (|). Truncated
	genes are indicated with a delta (D) symbol
	(#) insertion of Tn6049 in pbrU
	(†) czcB truncated by Tn6050-mediated rearrangement (inversion) and IS1088 insertion between czcL and hns
	(*) insertion of ISRme3 in nimA
	(‡) insertion of IS1088 between hmyB and hmyA
