# Supplementary material for: The Complete Genome Sequence of Cupriavidus metallidurans Strain CH34, a Master Survivalist in Harsh and Anthropogenic Environments
Source: PLoS One. 2010 May 5;5(5):e10433. doi: 10.1371/journal.pone.0010433 (PMC2864759; doi:10.1371/journal.pone.0010433)
Supplement: Table S7 — Signal transduction systems. Domain profiles of C. metallidurans CH34 and related organisms listed in Table 2 and E. coli K-12 (source: http://mistdb.com/). Only domains that occur 10 times or more in CH34 are considered. Extreme underrepresentations of domains (according to actual numbers versus genome size) are shaded in orange. Rows 25–27 hold the distributions of predicted one-component and two-component signal transduction systems (denoted as 1CST and 2CST, respectively) as well as the total number of predicted systems. The latter was used to calculate the proportional number (in percentages) of proteins putatively involved in signal transduction. (0.02 MB XLS) [file pone.0010433.s015.xls]

## Sheet: Sheet1
MiSTdb ID			341	376	212	680	213	325	595	606	545	468	656
Domain	Type	Function	Cmet	Ceut	Cpin	Ctai	Rsol	Bxen	Daci	Bpet	Jant	Hars	Pnec
HTH_1	output	DNA-binding	126	166	163	119	77	175	167	123	55	26	2
bug	input	small-molecule binding	123	155	131	103	2	13	159	107	10	5	8
LysR_substrate	input	small-molecule binding	122	163	156	113	75	170	165	124	52	26	0
Response_reg	receiver	response regulator	98	90	83	76	64	98	94	38	63	46	4
HATPase-c	transmitter	hisitidine kinase	72	69	64	58	49	82	81	32	49	40	6
HisKA	transmitter	hisitidine kinase	55	52	49	46	35	66	65	25	35	28	2
HAMP	input	protein-protein interaction	45	35	43	30	36	53	55	16	38	28	1
GntR	output	DNA-binding	44	58	55	46	20	71	46	40	17	12	3
TetR_N	input	small-molecule binding	36	40	43	35	24	58	30	29	16	4	1
Trans_reg_C	output	DNA-binding	35	26	23	22	27	30	32	18	21	14	0
GGDEF	output	di-guanylate cyclase	30	20	27	17	23	32	40	2	32	33	0
PAS	input	small-molecule binding	30	32	37	24	24	39	36	14	23	25	2
HTH_AraC	output	DNA-binding	28	41	45	36	24	75	39	28	25	4	0
FCD	input	small-molecule binding	24	27	25	22	9	43	25	23	9	6	2
EAL	output	di-guanylate cyclase	23	12	15	8	14	28	23	2	17	16	0
IclR	output	DNA-binding	22	36	36	28	6	36	18	23	3	2	1
Cupin_2	input	enzymatic	17	25	17	13	13	32	12	12	12	7	1
MarR	output	DNA-binding	17	26	23	23	19	34	27	23	12	6	1
Sigma54_activat	input	protein-protein interaction	16	19	22	18	13	21	14	8	7	8	0
MCPsignal	chemotaxis	MCP	16	13	23	13	23	32	31	7	21	14	0
MerR	output	DNA-binding	16	9	10	10	8	20	16	6	8	7	1
GAF	input	small-molecule binding	10	10	11	10	5	20	11	9	9	7	1
total 1CST			426	507	513	389	285	644	474	347	213	130	14
total 2CST			182	164	163	143	136	190	193	73	134	102	10
total			608	671	676	532	421	834	667	420	347	232	24
nr. proteins			6319	6626	6446	5897	5116	8702	6153	5095	3750	3325	1508
% ST proteins			9.6	10.1	10.5	9	8.2	9.6	10.8	8.3	9.3	7	1.6
source: http://mistdb.com/
